# Supplementary material for: Real-world use of oral versus subcutaneous semaglutide in a cohort of type 2 diabetic patients: which option to which patient?
Source: Springer Nature journal article supplement (doi:10.1007/s40618-024-02369-4), 2024-04-29

Figure S1.

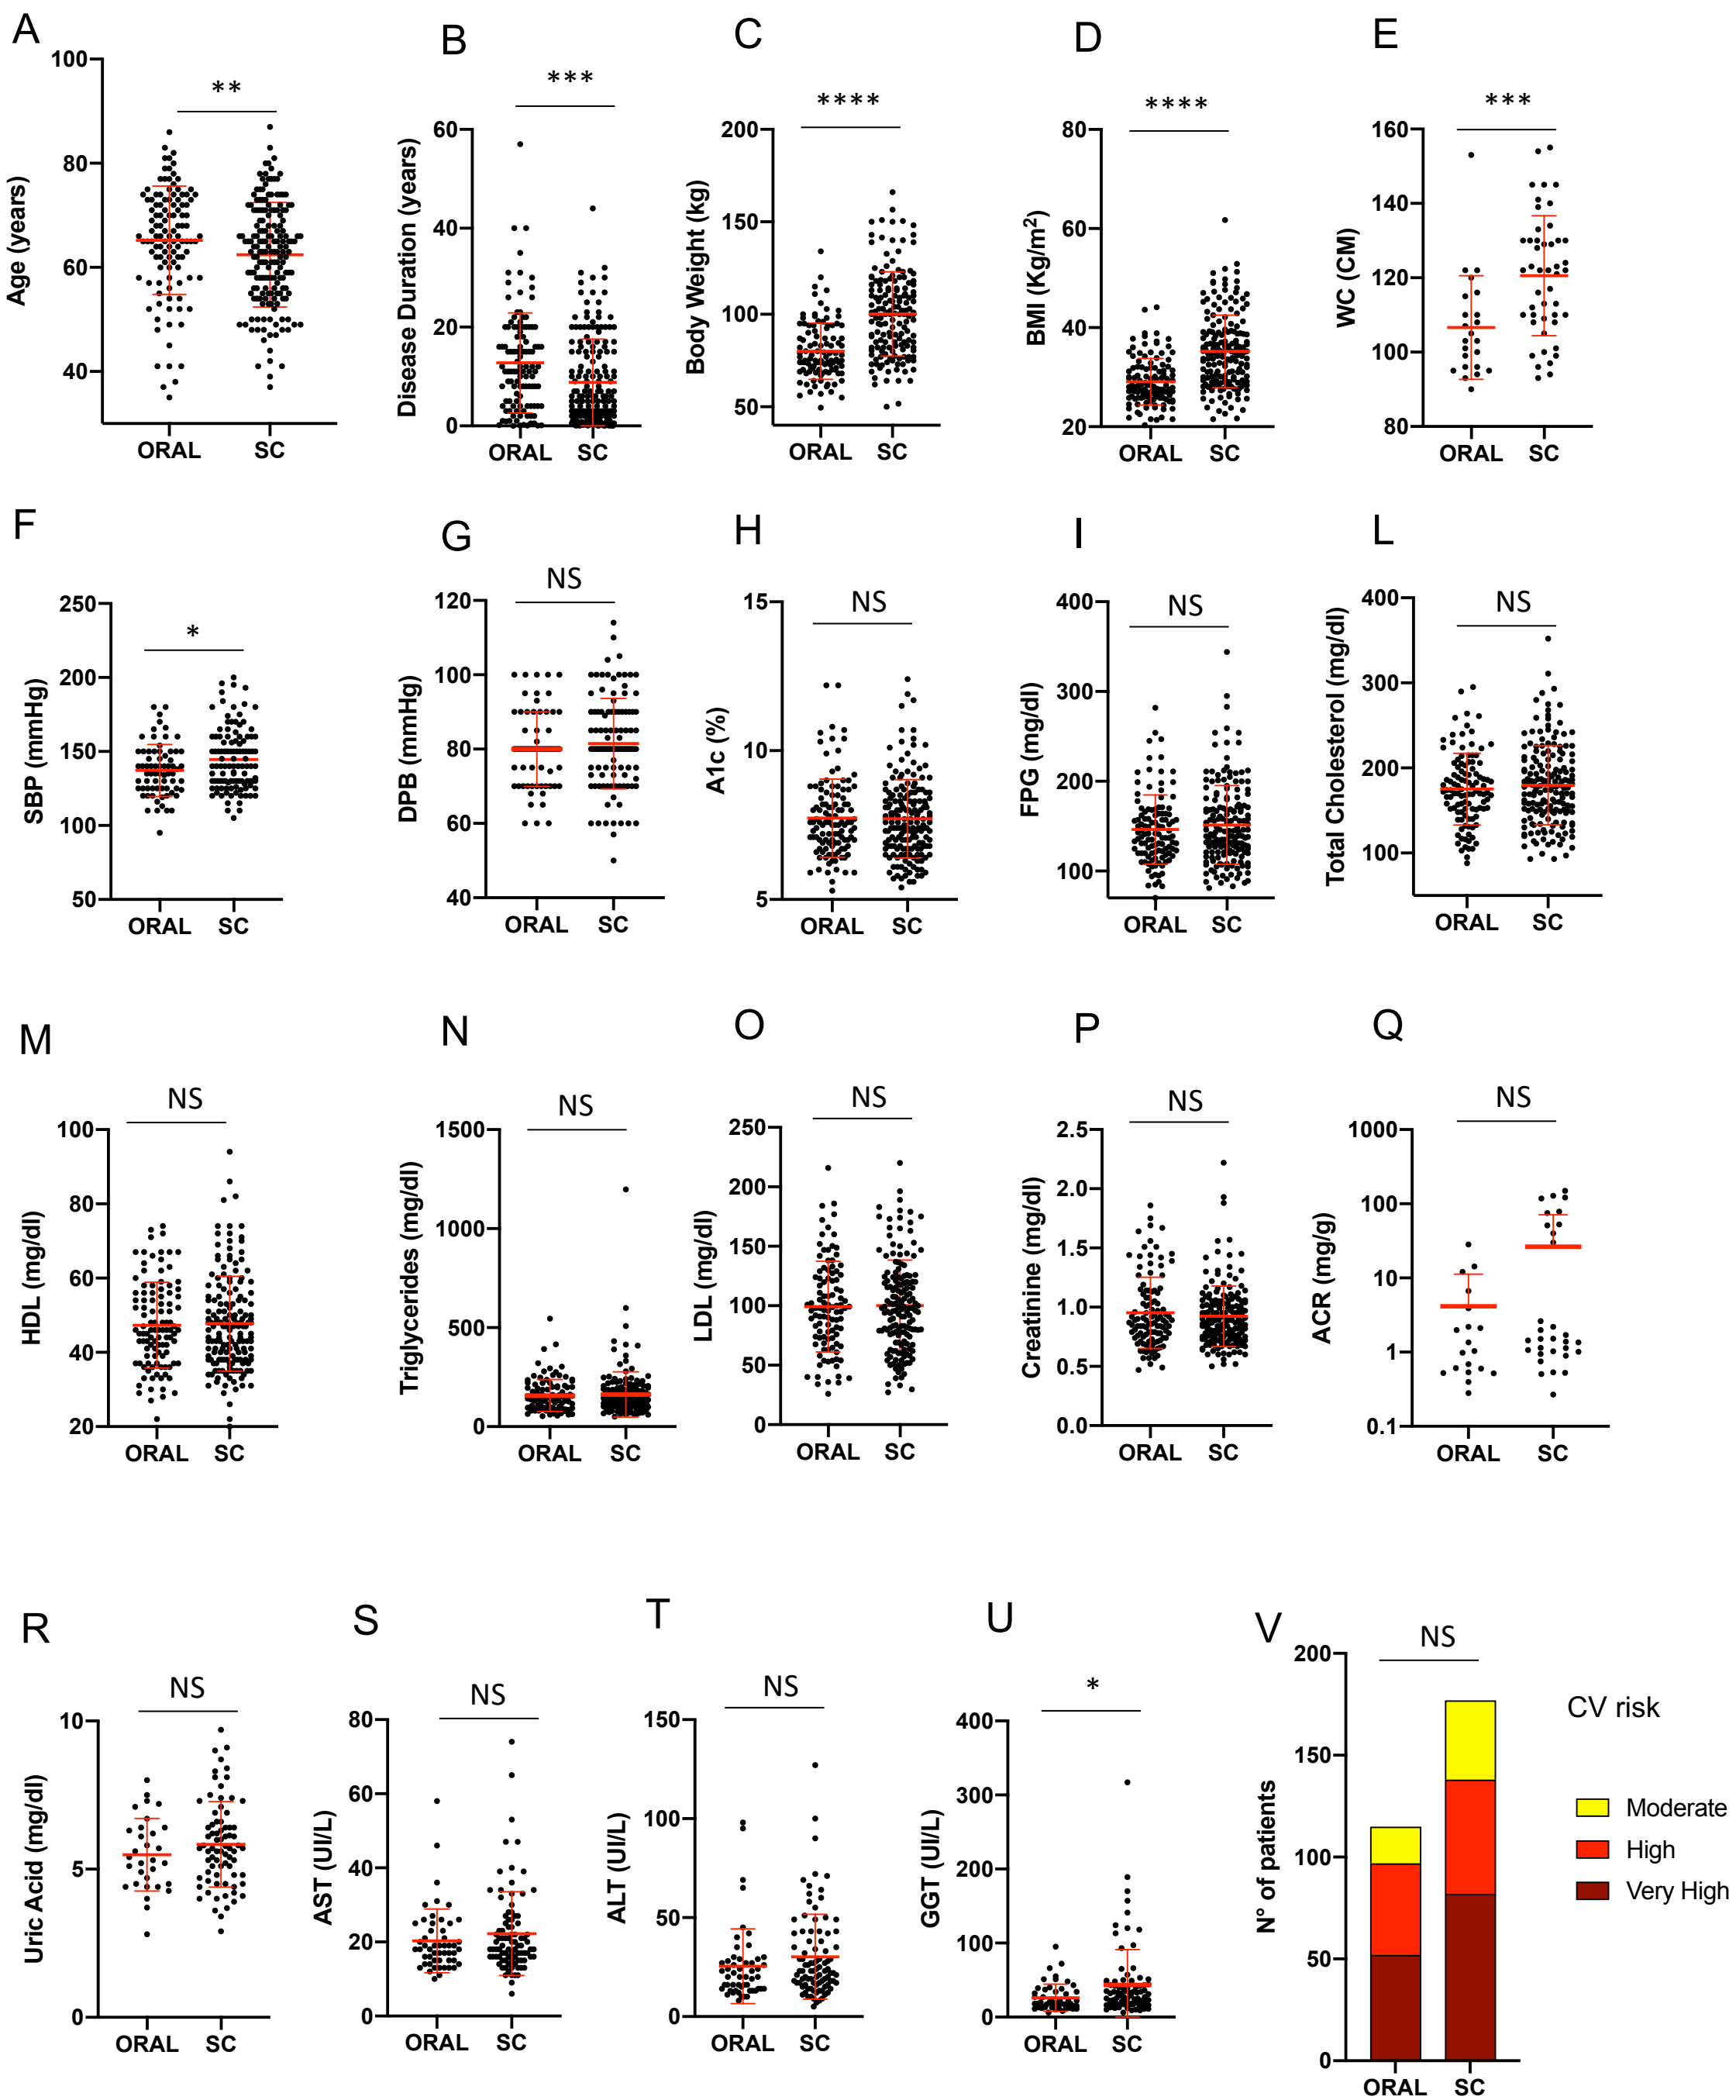

Supplement: MOESM1 [file 27034836]
