# Supplementary material for: Real-world use of oral versus subcutaneous semaglutide in a cohort of type 2 diabetic patients: which option to which patient?
Source: Springer Nature journal article supplement (doi:10.1007/s40618-024-02369-4), 2024-04-29
Supplement: MOESM3 [file 27034836]

Table S1.

| Treatment schedule           |                                        | Oral Semaglutide | OW Semaglutide | p value       |
|------------------------------|----------------------------------------|------------------|----------------|---------------|
| Monotherapy                  |                                        | 1 (0,9%)         | 1 (0,6%)       | 0,75          |
| Dual Therapy                 |                                        | 24 (20,9%)       | 67 (37,9%)     | <b>0,0022</b> |
|                              | Add-on to metformin                    | 22 (19,15%)      | 65 (36,7%)     | <b>0,0016</b> |
|                              | Add-on to basal insulin                | 0                | 2 (1,2%)       | 0,25          |
|                              | Add-on to SGLT2-i                      | 2 (1,75%)        | 0              | 0,07          |
| Triple Therapy               |                                        | 14 (12,2%)       | 33 (18,6%)     | 0,14          |
|                              | Add-on Met+Basal                       | 2 (1,75%)        | 16 (9%)        | <b>0,011</b>  |
|                              | Add-on Met+SGLT2i                      | 8 (6,95%)        | 4 (2,2%)       | <b>0,048</b>  |
|                              | Add-on Met+Pio                         | 2 (1,75%)        | 6 (3,4%)       | 0,4           |
|                              | Add-on Met+SUs                         | 2 (1,75%)        | 3 (1,7%)       | 0,9           |
|                              | Add-on BB                              | 0                | 1 (0,6%)       | 0,4           |
|                              | Add-on Met/Empa+Basal                  | 0                | 3 (1,7%)       | 0,16          |
| Replacement therapy          |                                        | 76 (66%)         | 76 (42,9%)     | <b>0,0001</b> |
|                              | DPP4i ( $\pm$ SGLT2i o SUs)            | 31 (26,95%)      | 21 (11,8%)     | <b>0,0016</b> |
|                              | SUs                                    | 19 (16,5%)       | 11 (6,2%)      | <b>0,0057</b> |
|                              | GLP1-RA                                | 9 (7,8%)         | 12 (6,7%)      | 0,7           |
|                              | SGLT2i                                 | 8 (6,95%)        | 11 (6,2%)      | 0,8           |
|                              | Metformin                              | 0                | 2 (1,2%)       | 0,25          |
|                              | Pioglitazone                           | 4 (3,5%)         | 0              | <b>0,012</b>  |
|                              | Acarbose                               | 0                | 1 (0,6%)       | 0,4           |
|                              | Insulin (basal and/or rapid analogues) | 5 (4,3%)         | 18 (10,2%)     | 0,07          |
| Post-replacement therapy (*) | +Metformin                             | 33 (43,5%)       | 35 (46,1%)     | 0,7           |
|                              | +Basal Insulin                         | 7 (9,2%)         | 5 (6,6%)       | 0,5           |
|                              | +Pioglitazone                          | 3 (3,9%)         | 0              | 0,08          |
|                              | +SGLT2i                                | 2 (2,6%)         | 0              | 0,15          |
|                              | +Met+Basal                             | 11 (14,5%)       | 14 (18,5%)     | 0,5           |
|                              | +Met+SGLT2i                            | 13 (17,1%)       | 1 (1,3%)       | <b>0,0008</b> |
|                              | +Met+Pio                               | 1 (1,3%)         | 7 (9,2%)       | <b>0,029</b>  |
|                              | +Met+SUs                               | 0                | 3 (3,9%)       | 0,08          |
|                              | +SGLT2i+Basal                          | 0                | 3 (3,9%)       | 0,08          |
|                              | +Met+Pio+SGLT2i                        | 0                | 1 (1,3%)       | 0,3           |
|                              | Monotherapy                            | 6 (7,9%)         | 5 (6,6%)       | 0,7           |
|                              | +Met+SGLT2i+Basal                      | 0                | 1 (1,3%)       | 0,3           |
|                              | + BB ( $\pm$ Met)                      | 0                | 1 (1,3%)       | 0,3           |

(\*)Percentage calculated on the total number of patient who received od/ow semaglutide as replacement therapy
